# Supplementary material for: Phase III Randomized Study of SB5, an Adalimumab Biosimilar, Versus Reference Adalimumab in Patients With Moderate‐to‐Severe Rheumatoid Arthritis
Source: PubMed Central journal article supplement — Arthritis Rheumatol. 2017 Nov 21;70(1):40–8. doi: 10.1002/art.40336 (PMC5765475; doi:10.1002/art.40336), 2017-11-21

## Supplementary Table 1

### Additional Inclusion Criteria

- Patients using nonsteroidal anti-inflammatory drugs or other analgesics for RA should be on a stable dose for  $\geq 4$  weeks before randomization.
- Patients who were not pregnant or nursing at screening and not planning to become pregnant from the time of screening until 5 months after last drug dose were included.
- Patients of childbearing age agreed to use at least 2 forms of contraception from screening until 5 months after last drug dose.
- Patients had to understand the implications of the trial and follow study requirements.

### Additional Exclusion Criteria

- Patients taking or planning to take live or live-attenuated vaccines within 8 weeks before randomization or during the study
- Patients with abnormal renal or hepatic function, abnormal hematologic parameters, positive serologic test for hepatitis B or hepatitis C virus, or a history of HIV infection
- Patients with chronic recurrent infections or history of infection of joint prosthesis
- Patients with history of congestive heart failure, uncontrolled diabetes mellitus, demyelinating disorders, malignancy (during the previous 5 years), lymphoproliferative disease (including lymphoma), organ transplantation
- Patients with physical incapacitation (ACR functional class IV or wheelchair-/bed-bound)

- Patients who had a substance abuse problem within 3 years before screening

**Supplementary Table 2. DAS28-ESR, SDAI, CDAI at Week 24**

|                                    | SB5 (N=269)   | ADL (N=273)   |
|------------------------------------|---------------|---------------|
| Mean ± SD change in DAS28-ESR      | -2.74±1.297   | -2.68±1.277   |
| Remission: DAS28-ESR <2.6, n/N (%) | 55/255 (21.6) | 51/257 (19.8) |
| LDA: DAS28-ESR ≤3.2, n/N (%)       | 87/255 (34.1) | 90/257 (35.0) |
| Mean ± SD change in SDAI           | -25.98±13.312 | -25.00±12.02  |
| Remission: SDAI ≤3.3, n/N (%)      | 28/254 (11.0) | 37/257 (14.4) |
| LDA: 3.3 < SDAI ≤11.0, n/N (%)     | 79/254 (31.1) | 80/257 (31.1) |
| Change in CDAI, mean ± SD          | -25.39±12.886 | -24.33±12.023 |
| Remission: CDAI ≤2.8, n/N (%)      | 29/256 (11.3) | 35/258 (13.6) |
| LDA: CDAI 2.8 to ≤10.0, n/N (%)    | 76/256 (29.7) | 76/258 (29.5) |

ADL=reference adalimumab; CDAI=clinical disease activity; DAS28=disease activity score in 28 joints; ESR=erythrocyte sedimentation rate; LDA=low disease activity; SDAI=simplified disease activity.

**Supplementary Figure 1.** Study design. ACR20=American College of Rheumatology 20% response criteria; ADL=reference adalimumab; EOW=every other week; F/U=follow up; ICF=informed consent form; MTX=methotrexate; R=randomization.

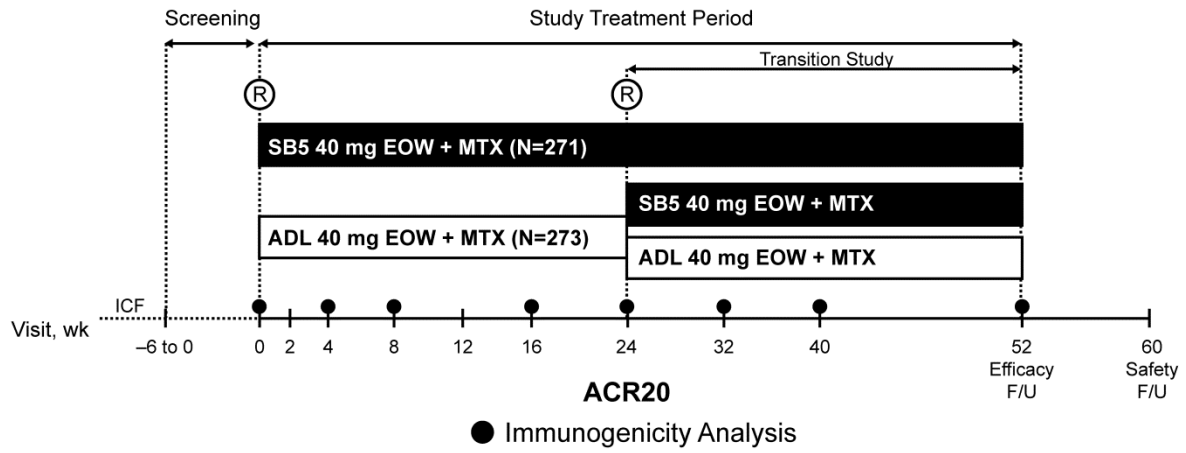

**Supplementary Figure 2.** ACR responses by ADA status up to week 24: ACR20 responses (A), ACR50 responses (B), ACR70 responses (C), and ACR-N (D). ACR20/50/70=American College of Rheumatology 20%/50%/70% response criteria; ACR-N=numeric index of the ACR response; ADA=antidrug antibodies; ADL=reference adalimumab.

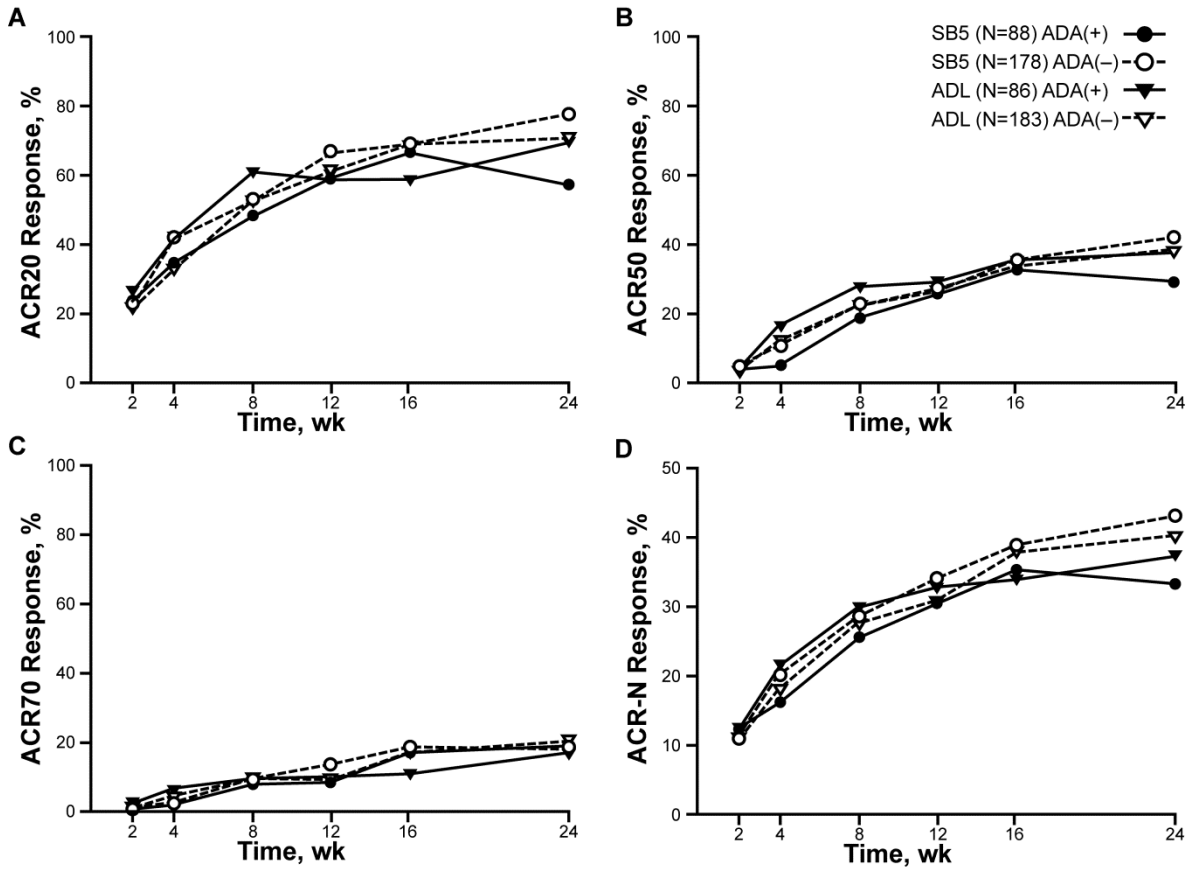

Supplement: ART-70-40-s001.pdf [file ART-70-40-s001.pdf]
